# Supplementary material for: Characterisation of Pb2Rh2O7 and Y2Rh2O7: an unusual case of pyrochlore stabilisation under high pressure, high temperature synthesis conditions
Source: Royal Society of Chemistry journal article supplement (doi:10.1039/d3tc04389d), 2024-01-01
Supplement: d3tc04389d1.pdf [file d3tc04389d1.pdf]

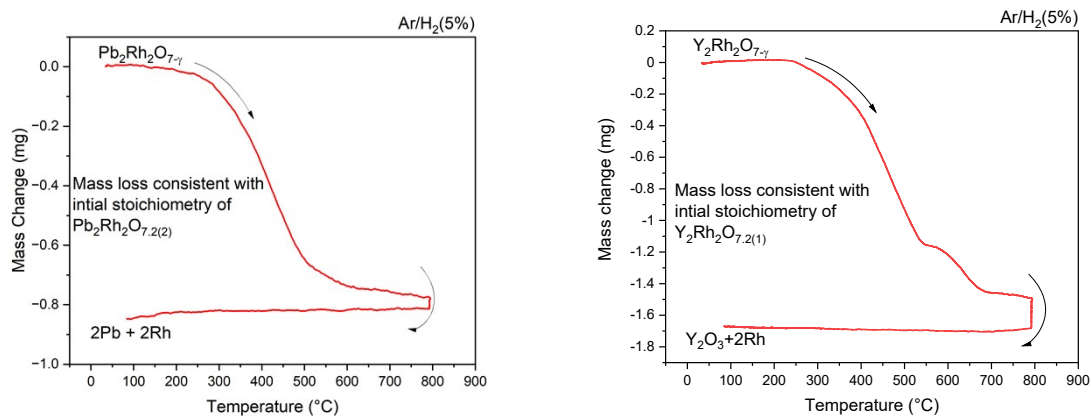

Figure SI1: TGA plots for Pb<sub>2</sub>Rh<sub>2</sub>O<sub>7</sub> and Y<sub>2</sub>Rh<sub>2</sub>O<sub>7</sub>.

Table SI1

| Material                 | PbRhO <sub>3</sub>        | YRhO <sub>3</sub>                  |
|--------------------------|---------------------------|------------------------------------|
| Space Group              | <i>P6<sub>3</sub>/mmc</i> | <i>Pbnm</i>                        |
| a (Å)                    | 3.61190(3)                | 5.522708(20)                       |
| b (Å)                    | 3.61190(3)                | 5.72375(23)                        |
| c (Å)                    | 11.15743(15)              | 7.57282(25)                        |
| γ (°)                    | 120                       | 90                                 |
| Volume (Å <sup>3</sup> ) | 126.057(2)                | 226.568(15)                        |
| Pb/Y (x,y,z)             | 0, 0, 0                   | 0.9787(21), 0.0844(15), ¼          |
| Rh (x,y,z)               | 1/3, 2/3, 1/2             | 0 ½ 0                              |
| O1 (x,y,z)               | 0, 0, ¼                   | 0.1215(30), 0.4541(25), ¼          |
| O2 (x,y,z)               | 1/3, 2/3, 0.062(6)        | 0.6786(18), 0.3143(20), 0.0639(14) |

Thermal displacement parameters were kept at nominal values ( $B_{\text{iso}} = 1$ ) and not refined

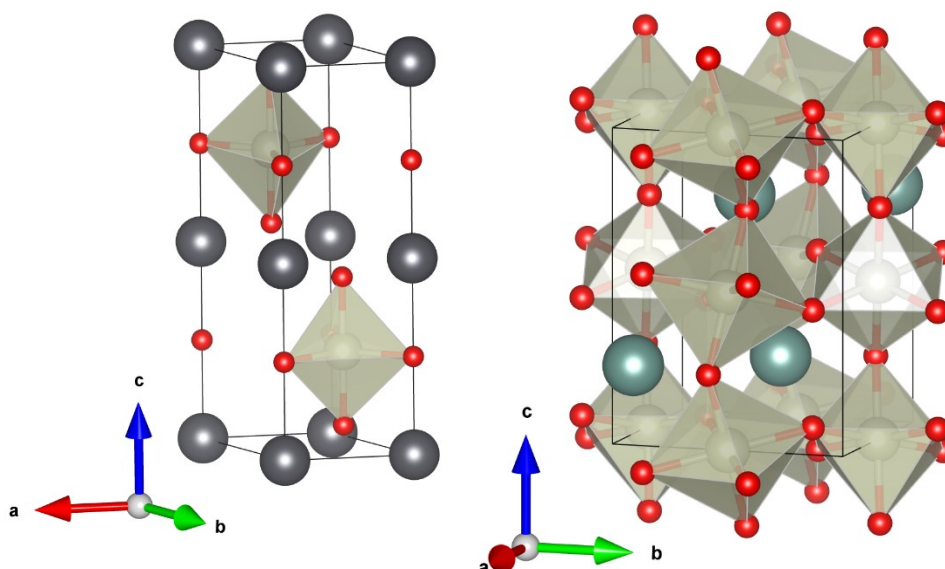

Refined crystal structures for PbRhO<sub>3</sub> (left) and YRhO<sub>3</sub> (right)

Table S12

| Composition                  | Pb <sub>2</sub> Rh <sub>2</sub> O <sub>7</sub> |                      | Y <sub>2</sub> Rh <sub>2</sub> O <sub>7</sub> |                       |
|------------------------------|------------------------------------------------|----------------------|-----------------------------------------------|-----------------------|
| Space group                  | <i>Fd3m</i>                                    |                      | <i>Fd3m</i>                                   |                       |
| Parameters                   | Experiment                                     | Theory<br>(GGA+U)    | Experiment                                    | Theory<br>(GGA+U)     |
| <i>a</i> (Å)                 | 10.10568(2)                                    | 10.201               | 10.11834(5)                                   | 10.149                |
| Volume (Å <sup>3</sup> )     | 1032.146(4)                                    | 1061.439             | 1035.924(9)                                   | 1045.282              |
| <i>A</i> (x,y,z) 16 <i>c</i> | ½, ½, ½                                        | ½, ½, ½              | ½, ½, ½                                       | ½, ½, ½               |
| Rh (x,y,z) 16 <i>d</i>       | 0, 0, 0                                        | 0, 0, 0              | 0, 0, 0                                       | 0, 0, 0               |
| O1 (x,y,z,) 48 <i>f</i>      | 0.33607(15), 1/8,<br>1/8                       | 0.33577, 1/8,<br>1/8 | 0.33536(17), 1/8,<br>1/8                      | 0.335098, 1/8,<br>1/8 |
| O2 (x,y,z) 8 <i>b</i>        | 3/8, 3/8, 3/8                                  | 3/8, 3/8, 3/8        | 3/8, 3/8, 3/8                                 | 3/8, 3/8, 3/8         |
| A–O1 (Å)                     | 2.4347(11)                                     | 2.4613               | 2.4443(12)                                    | 2.4534                |
| A–O2 (Å)                     | 2.1879                                         | 2.2085               | 2.1907                                        | 2.1972                |
| Rh–O1 (Å)                    | 1.9880(10)                                     | 2.0043               | 1.9863(11)                                    | 1.9911                |
| Rh–O1–Rh (°)                 | 127.8(3)                                       | 128.23               | 128.46(3)                                     | 128.58                |

CSD deposition numbers:

Pb<sub>2</sub>Rh<sub>2</sub>O<sub>7</sub>: 2324706

Y<sub>2</sub>Rh<sub>2</sub>O<sub>7</sub>: 2324707

PbRhO<sub>3</sub>: 2324705
